# Supplementary material
Source: publisher figshare collection journal article supplement (https://diabetesjournals.figshare.com/articles/dataset/_/12620303)
Supplement: Supplementary file 1 [file 1]

| Supplementary Table S1. Insulin aspart correctional dosing scale |          |             |           |
|------------------------------------------------------------------|----------|-------------|-----------|
| POC-BG Value                                                     | Low-Dose | Medium-Dose | High-Dose |
| 151-200 mg/dL                                                    | +1       | +2          | +3        |
| 201-250 mg/dL                                                    | +2       | +4          | +6        |
| 251-300 mg/dL                                                    | +3       | +6          | +9        |
| 301-349 mg/dL                                                    | +4       | +8          | +12       |
| ≥ 350 mg/dL                                                      | +5       | +10         | +15       |

POC-BG: point of care blood glucose

| Supplementary Table S2. Insulin glargine dose titration protocol |                 |
|------------------------------------------------------------------|-----------------|
| Fasting POC-BG Value                                             | Dose Adjustment |
| < 60 mg/dL                                                       | Decrease by 20% |
| 60-79 mg/dL                                                      | Decrease by 10% |
| 80-139 mg/dL                                                     | No change       |
| 140-179 mg/dL                                                    | Increase by 10% |
| 180-249 mg/dL                                                    | Increase by 20% |
| >250 mg/dL                                                       | Increase by 30% |

POC-BG: point of care blood glucose

## Supplementary Figure S1. Glucose Telemetry System

## Supplementary Figure S2. Trial Profile

GTS: glucose telemetry system
